# Supplementary material for: Designing Sustainable Domestic Electricity Supply from Renewable Energy Mixes: Application to Java and Bali, Indonesia
Source: MDPI journal article supplement (doi:10.3390/en16227461), 2023-11-07
Supplement: s1 [file s1]

## Supplementary Materials

### S1. Domestic electricity demand

Table S1 shows the growth of domestic electricity demand and the number of households each year being customers. This study focused on the demand in 2020, which was 72.76 TWh.

Table S1. Growth of domestic electricity demand from 2010 to 2020 [1].

| Year                                 | Average kWh/household | Total households (10 <sup>3</sup> ) | Total household consumption (TWh) | Percentage of increase (%) |
|--------------------------------------|-----------------------|-------------------------------------|-----------------------------------|----------------------------|
| 2010                                 | 1521.00               | 26.59                               | 40.44                             | -                          |
| 2011                                 | 1529.00               | 28.07                               | 42.91                             | 6.13                       |
| 2012                                 | 1561.00               | 30.21                               | 47.16                             | 9.90                       |
| 2013                                 | 1540.64               | 32.51                               | 50.09                             | 6.21                       |
| 2014                                 | 1577.00               | 34.47                               | 54.36                             | 8.52                       |
| 2015                                 | 1567.00               | 35.69                               | 55.93                             | 2.89                       |
| 2016                                 | 1581.00               | 38.16                               | 60.33                             | 7.87                       |
| 2017                                 | 1510.00               | 39.98                               | 60.37                             | 0.06                       |
| 2018                                 | 1481.00               | 41.88                               | 62.02                             | 2.73                       |
| 2019                                 | 1490.00               | 43.83                               | 65.30                             | 5.29                       |
| <b>2020</b>                          | <b>1608.70</b>        | <b>45.38</b>                        | <b>72.76</b>                      | <b>11.42</b>               |
| Annual increase percentage (average) |                       |                                     |                                   | 6.10                       |

### S2 Electricity Generation from Wind Turbines

Power generated from wind turbines depends on the turbine type, size, and wind speeds. For simplification, this study used a wind turbine model (Enercon E-115) with specifications as shown in Table S2.

Table S2. Enercon-115 specifications.

|                           |         |                |
|---------------------------|---------|----------------|
| Rated power               | 3       | MW             |
| Hub height                | 92      | m              |
| Maximum power coefficient | 47      | %              |
| Rated wind speed          | 12      | m/s            |
| Rotor diameter            | 115.7   | m              |
| Swept area                | 10515.5 | m <sup>2</sup> |
| Cut-in wind speed         | 2       | m/s            |
| Rated wind speed          | 12      | m/s            |

|                    |    |     |
|--------------------|----|-----|
| Cut-out wind speed | 28 | m/s |
|--------------------|----|-----|

The output power from the turbine is determined by the formula below:

$$P_t = \frac{1}{2} * \rho * A * v^3 * C_p \quad (S1)$$

Where  $P_t$  is the generated power (Watt),  $\rho$  is the density of air (1.225 kg/m<sup>3</sup>),  $A$  is the swept area of rotor blades (m<sup>2</sup>),  $v$  is the wind speed (m/s) at hub height and  $C_p$  is the power coefficient. The power coefficient of turbines can reach 0.59 [2].

In order to calculate the generated power, the wind speed needs to be corrected due to the vertical difference in wind speeds [3]. The wind speed is measured at the height of 10 m, while the hub height is 92 m. The wind speeds need to be modified by a power law exponent  $\alpha$ , taken as 1/7 [3,4]. The formulation of wind speed at hub height is given by

$$v_{hub} = v_{10} * \left(\frac{h_{hub}}{10}\right)^\alpha \quad (S2)$$

$v_{hub}$  is the wind speed at hub height (m/s),  $v_{10}$  is the wind speed at 10 m (m/s) and  $h_{hub}$  is the hub height (m).

### S3 Diagram of scenarios used in this study

Table S3 presents the 35 scenarios used in this study and their relation to the electricity production by each RES, the value of each KPI within each scenario and the electricity production coverage to the electricity demand. Scenarios 1-6 are the baseline. Scenario 1 used only the existing capacity while scenario 2-6 used four of five existing capacities with the remaining RES was set to maximum capacity. Scenario 2 relied on geothermal and spent the highest CAPEX and OPEX among the baseline scenarios to successfully meet the electricity demand. Meanwhile, scenario 5 was less polluting and the most CAPEX- and OPEX-efficient scenario, but with high curtailment. Scenarios 2, 5 and 6 can already meet the demand and even result in curtailments. This study adjusted those three scenarios to become adjusted 2, 5 and 6 (as seen in scenarios 33 – 35) to mitigate curtailments. Then, each KPI as the consequences were recalculated.

Table S3. Overview of all scenarios.

|    | Scenarios |       |     |       |      | Electricity Production (TWh) |       |      |        |        | KPIs        |                  |         |                                  |                               | Energy efficiency (%) | Demand (TWh) | Deficit/Curtailment (TWh) |
|----|-----------|-------|-----|-------|------|------------------------------|-------|------|--------|--------|-------------|------------------|---------|----------------------------------|-------------------------------|-----------------------|--------------|---------------------------|
|    | Geo       | Hydro | MSW | Solar | Wind | Geo                          | Hydro | MSW  | Solar  | Wind   | CAPEX (B\$) | OPEX 25 yr (B\$) | ROI %   | CO <sub>2</sub> emission* (Mton) | CO <sub>2</sub> reduction (%) |                       |              |                           |
| 1  | 0         | 0     | 0   | 0     | 0    | 10.14                        | 25.12 | 1.61 | 0.02   | 0.02   | 11.01       | 3.80             | 245.75  | 1359.69                          | 95.51                         | 51                    | 72.76        | -35.86                    |
| 2  | 1         | 0     | 0   | 0     | 0    | 59.11                        | 25.12 | 1.61 | 0.02   | 0.02   | 35.99       | 19.87            | 23.98   | 3220.49                          | 89.36                         | 118                   | 72.76        | 13.11                     |
| 3  | 0         | 1     | 0   | 0     | 0    | 10.14                        | 43.71 | 1.61 | 0.02   | 0.02   | 14.98       | 3.80             | 172.66  | 1805.89                          | 94.03                         | 76                    | 72.76        | -17.27                    |
| 4  | 0         | 0     | 1   | 0     | 0    | 10.14                        | 25.12 | 4.34 | 0.02   | 0.02   | 11.80       | 4.59             | 223.35  | 1987.01                          | 93.43                         | 54                    | 72.76        | -33.13                    |
| 5  | 0         | 0     | 0   | 1     | 0    | 10.14                        | 25.12 | 1.61 | 168.04 | 0.02   | 40.25       | 18.54            | 135.85  | 9425.02                          | 68.86                         | 282                   | 72.76        | 132.17                    |
| 6  | 0         | 0     | 0   | 0     | 1    | 10.14                        | 25.12 | 1.61 | 0.02   | 685.25 | 87.47       | 3.82             | 2047.60 | 9582.48                          | 68.34                         | 992                   | 72.76        | 649.38                    |
| 7  | 0         | 0     | 0   | 1     | 1    | 10.14                        | 25.12 | 1.61 | 168.04 | 685.25 | 116.71      | 18.56            | 1431.49 | 17647.80                         | 41.69                         | 1223                  | 72.76        | 817.40                    |
| 8  | 0         | 0     | 1   | 0     | 1    | 10.14                        | 25.12 | 4.34 | 0.02   | 685.25 | 88.26       | 4.61             | 2014.86 | 10209.80                         | 66.27                         | 996                   | 72.76        | 652.10                    |
| 9  | 0         | 1     | 0   | 0     | 1    | 10.14                        | 43.71 | 1.61 | 0.02   | 685.25 | 91.44       | 3.82             | 1971.03 | 10028.68                         | 66.86                         | 1018                  | 72.76        | 667.97                    |
| 10 | 1         | 0     | 0   | 0     | 1    | 59.11                        | 25.12 | 1.61 | 0.02   | 685.25 | 112.45      | 19.89            | 1413.02 | 11443.28                         | 62.19                         | 1060                  | 72.76        | 698.34                    |
| 11 | 0         | 0     | 1   | 1     | 0    | 10.14                        | 25.12 | 4.34 | 168.04 | 0.02   | 41.05       | 19.33            | 135.64  | 10052.33                         | 66.79                         | 285                   | 72.76        | 134.90                    |
| 12 | 0         | 1     | 0   | 1     | 0    | 10.14                        | 43.71 | 1.61 | 168.04 | 0.02   | 44.22       | 18.54            | 140.53  | 9871.21                          | 67.38                         | 307                   | 72.76        | 150.76                    |
| 13 | 1         | 0     | 0   | 1     | 0    | 59.11                        | 25.12 | 1.61 | 168.04 | 0.02   | 65.23       | 34.61            | 80.73   | 11285.81                         | 62.71                         | 349                   | 72.76        | 181.14                    |
| 14 | 0         | 1     | 1   | 0     | 0    | 10.14                        | 43.71 | 4.34 | 0.02   | 0.02   | 15.77       | 4.59             | 160.34  | 2434.52                          | 91.96                         | 80                    | 72.76        | -14.54                    |
| 15 | 1         | 0     | 1   | 0     | 0    | 59.11                        | 25.12 | 4.34 | 0.02   | 0.02   | 36.78       | 20.66            | 26.85   | 3848.99                          | 87.28                         | 122                   | 72.76        | 15.84                     |
| 16 | 1         | 1     | 0   | 0     | 0    | 59.11                        | 43.71 | 1.61 | 0.02   | 0.02   | 39.95       | 19.87            | 36.30   | 3666.31                          | 87.89                         | 144                   | 72.76        | 31.69                     |
| 17 | 0         | 0     | 1   | 1     | 1    | 10.14                        | 25.12 | 4.34 | 168.04 | 685.25 | 117.51      | 19.35            | 1416.42 | 18276.56                         | 39.61                         | 1227                  | 72.76        | 820.14                    |
| 18 | 0         | 1     | 0   | 1     | 1    | 10.14                        | 43.71 | 1.61 | 168.04 | 685.25 | 120.68      | 18.56            | 1396.67 | 18093.88                         | 40.21                         | 1249                  | 72.76        | 835.99                    |
| 19 | 1         | 0     | 0   | 1     | 1    | 59.11                        | 25.12 | 1.61 | 168.04 | 685.25 | 141.69      | 34.63            | 1098.65 | 19508.35                         | 35.54                         | 1291                  | 72.76        | 866.36                    |
| 20 | 0         | 1     | 1   | 0     | 1    | 10.14                        | 43.71 | 4.34 | 0.02   | 685.25 | 92.23       | 4.61             | 1940.90 | 10657.31                         | 64.79                         | 1022                  | 72.76        | 670.70                    |
| 21 | 1         | 0     | 1   | 0     | 1    | 59.11                        | 25.12 | 4.34 | 0.02   | 685.25 | 113.24      | 20.68            | 1397.83 | 12071.78                         | 60.11                         | 1064                  | 72.76        | 701.07                    |
| 22 | 1         | 1     | 0   | 0     | 1    | 59.11                        | 43.71 | 1.61 | 0.02   | 685.25 | 116.41      | 19.89            | 1377.99 | 11889.10                         | 60.72                         | 1085                  | 72.76        | 716.92                    |
| 23 | 0         | 1     | 1   | 1     | 0    | 10.14                        | 43.71 | 4.34 | 168.04 | 0.02   | 45.01       | 19.33            | 140.23  | 10499.84                         | 65.31                         | 311                   | 72.76        | 153.49                    |

|            |      |      |      |       |       |       |       |      |        |        |        |       |         |          |       |        |       |        |
|------------|------|------|------|-------|-------|-------|-------|------|--------|--------|--------|-------|---------|----------|-------|--------|-------|--------|
| 24         | 1    | 0    | 1    | 1     | 0     | 59.11 | 25.12 | 4.34 | 168.04 | 0.02   | 66.02  | 35.40 | 81.47   | 11914.31 | 60.63 | 353    | 72.76 | 183.87 |
| 25         | 1    | 1    | 1    | 0     | 0     | 59.11 | 43.71 | 4.34 | 0.02   | 0.02   | 40.75  | 20.66 | 38.68   | 4295.06  | 85.81 | 147    | 72.76 | 34.43  |
| 26         | 1    | 1    | 0    | 1     | 0     | 59.11 | 43.71 | 1.61 | 168.04 | 0.02   | 69.20  | 34.61 | 85.66   | 11731.63 | 61.24 | 374    | 72.76 | 199.72 |
| 27         | 0    | 1    | 1    | 1     | 1     | 10.14 | 43.71 | 4.34 | 168.04 | 685.25 | 121.47 | 19.35 | 1382.41 | 18722.59 | 38.14 | 1253   | 72.76 | 838.72 |
| 28         | 1    | 0    | 1    | 1     | 1     | 59.11 | 25.12 | 4.34 | 168.04 | 685.25 | 142.48 | 35.42 | 1090.01 | 20137.10 | 33.46 | 1294   | 72.76 | 869.10 |
| 29         | 1    | 1    | 0    | 1     | 1     | 59.11 | 43.71 | 1.61 | 168.04 | 685.25 | 145.66 | 34.63 | 1363.64 | 19954.42 | 34.07 | 1316   | 72.76 | 884.95 |
| 30         | 1    | 1    | 1    | 0     | 1     | 59.11 | 43.71 | 4.34 | 0.02   | 685.25 | 117.21 | 20.68 | 86.30   | 12517.85 | 58.64 | 1089   | 72.76 | 719.66 |
| 31         | 1    | 1    | 1    | 1     | 0     | 59.11 | 43.71 | 4.34 | 168.04 | 0.02   | 69.99  | 35.40 | 1070.80 | 12360.38 | 59.16 | 378    | 72.76 | 202.45 |
| 32         | 1    | 1    | 1    | 1     | 1     | 59.11 | 43.71 | 4.34 | 168.04 | 685.25 | 146.45 | 35.42 | 24.47   | 20583.17 | 31.99 | 1320   | 72.76 | 887.69 |
| Adjusted 2 | 5.26 | 2.87 | 0.18 | 0.00  | 0.00  | 46.11 | 25.12 | 1.61 | 0.02   | 0.02   | 29.35  | 15.60 | 29.37   | 2726.31  | 90.99 | 100.00 | 72.76 | 0      |
| Adjusted 5 | 1.16 | 2.87 | 0.18 | 14.89 | 0.00  | 10.14 | 25.12 | 1.61 | 35.96  | 0.02   | 24.15  | 10.42 | 48.34   | 3085.10  | 89.81 | 100.00 | 72.76 | 0      |
| Adjusted 6 | 1.16 | 2.87 | 0.18 | 0.00  | 12.27 | 10.14 | 25.12 | 1.61 | 0.02   | 35.91  | 50.07  | 3.81  | 138.99  | 1790.37  | 94.08 | 100.00 | 72.76 | 0      |

Legend:

- Design of scenarios (Green)
- Electricity production (Yellow)
- KPIs (Grey)
- The geo-based energy mix (Red) uses the current capacity of solar and wind energy, the maximum potential of hydropower and MSW, and an adjustment of the geothermal potential.
- The solar-based energy mix (Orange) uses the current capacity of geothermal and wind energy, the maximum potential of hydropower and MSW, and an adjustment of the solar potential.
- The wind-based energy mix (Blue) uses the current capacity of solar and geothermal energy, the maximum potential of hydropower and MSW, and an adjustment of the wind potential.
- 0 means only using the existing capacity of each RES in 2020
- 1 means using all available potential of each RES in 2020

## S4 Electricity generation and storage requirements on Java and Bali islands in 2020

Figure S1 presents the typical electricity generation from three primary energy mixes. The average hourly electricity generation was calculated monthly to depict detailed features of high and low electricity generation periods.

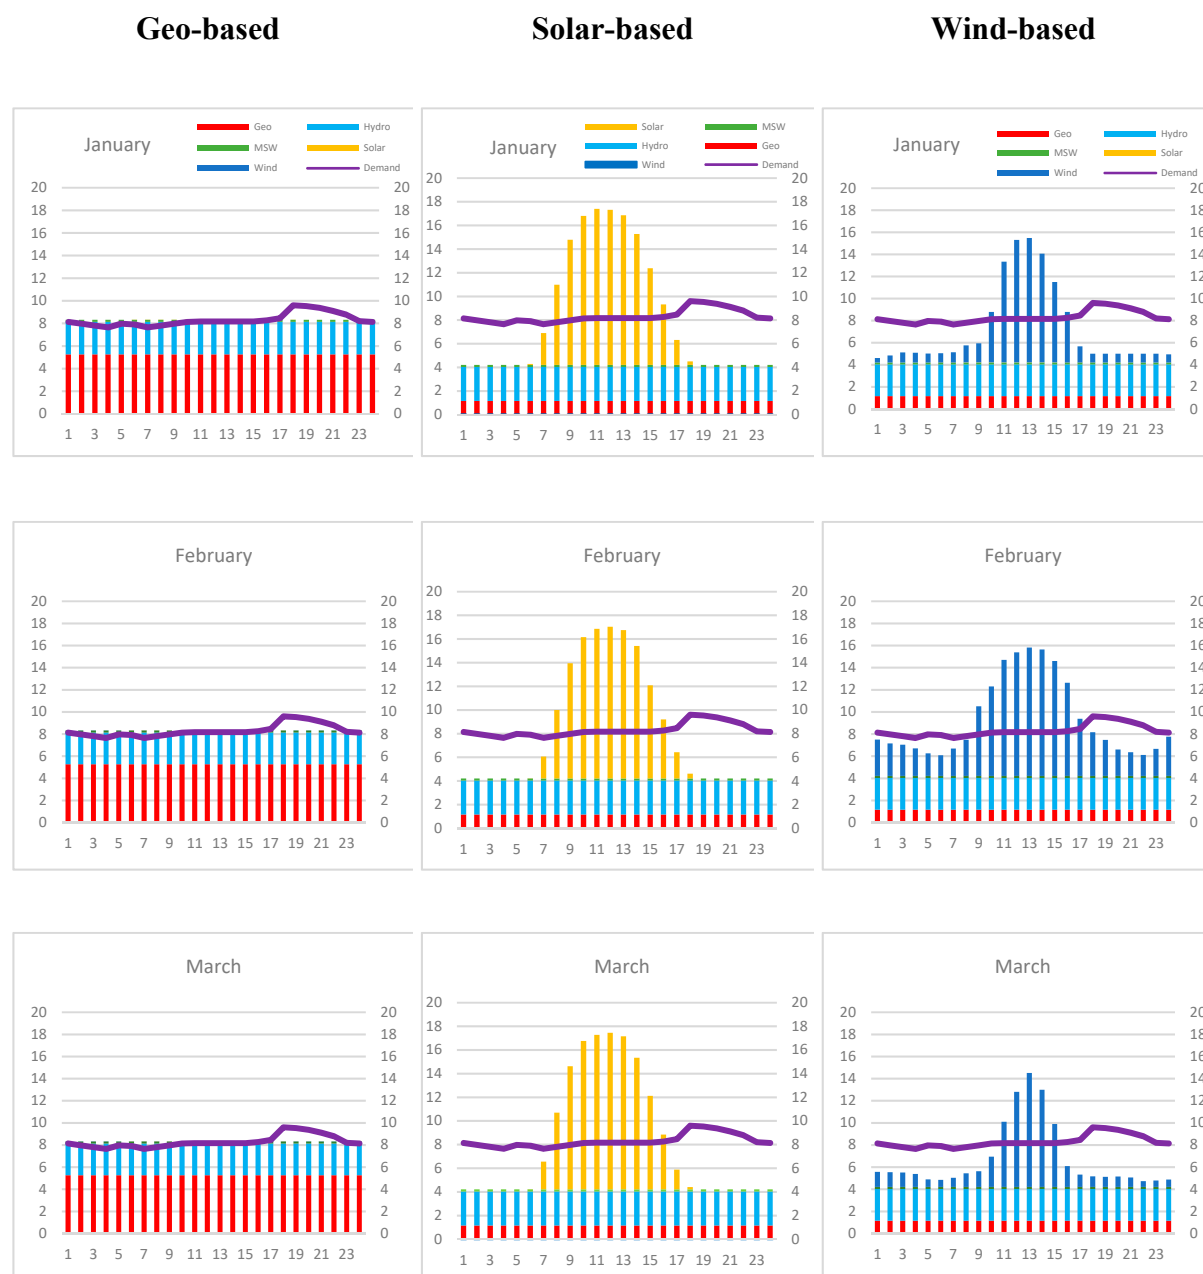

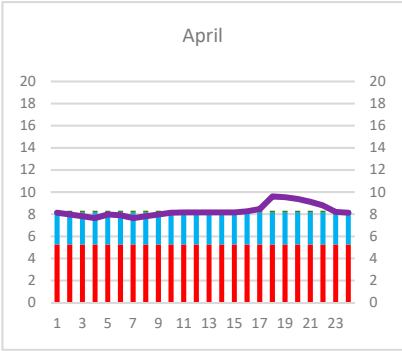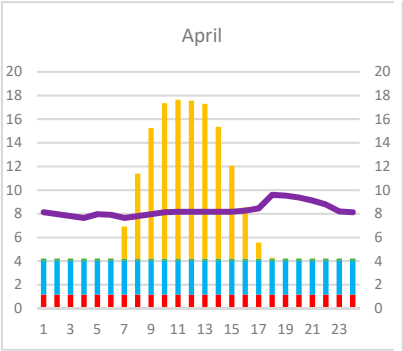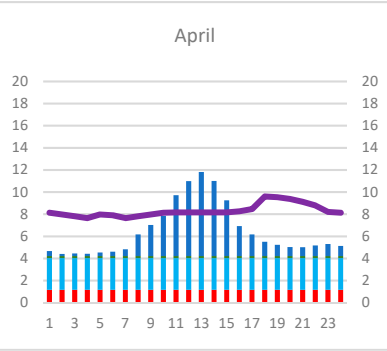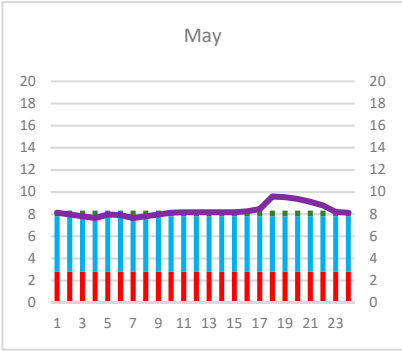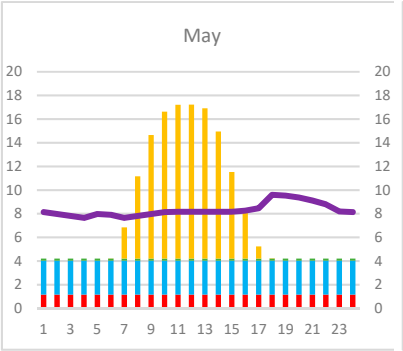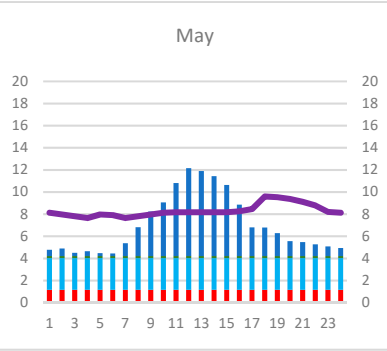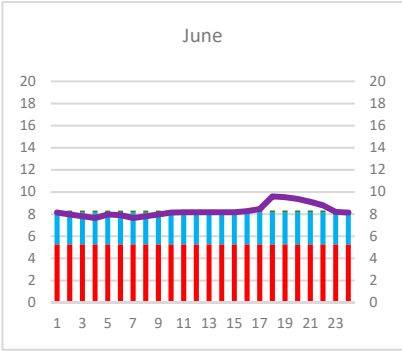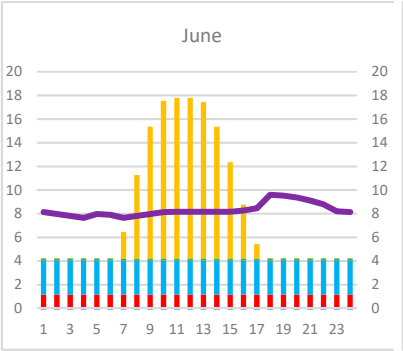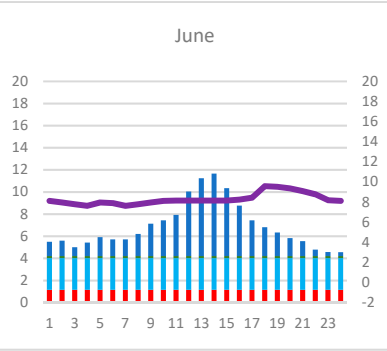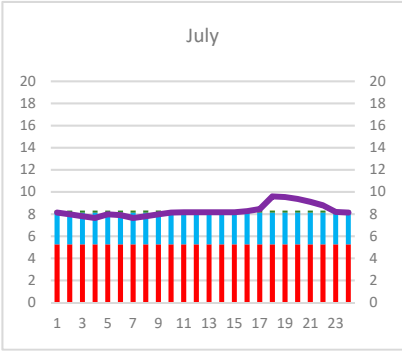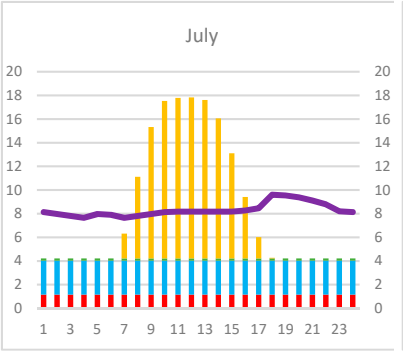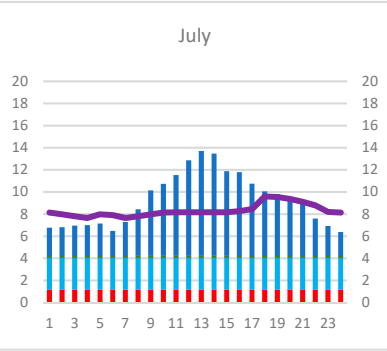

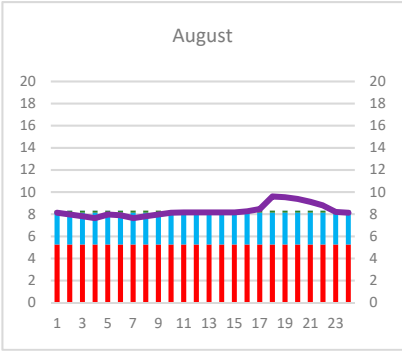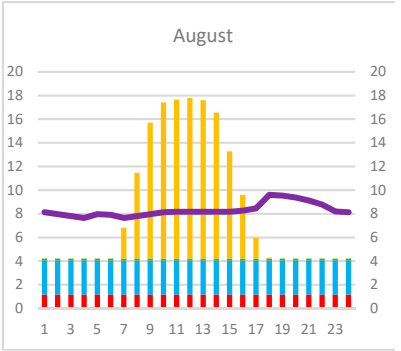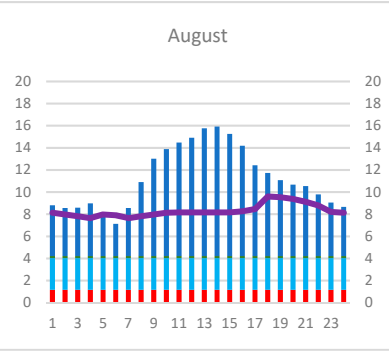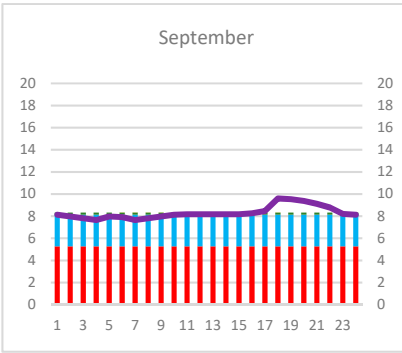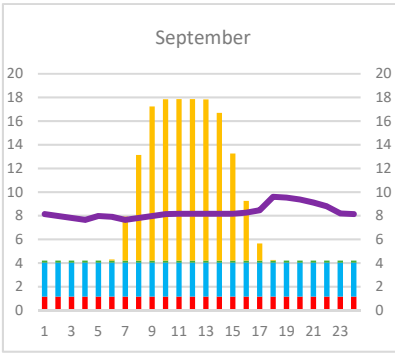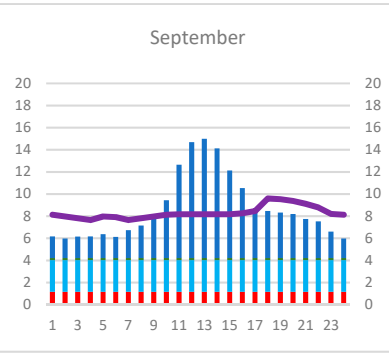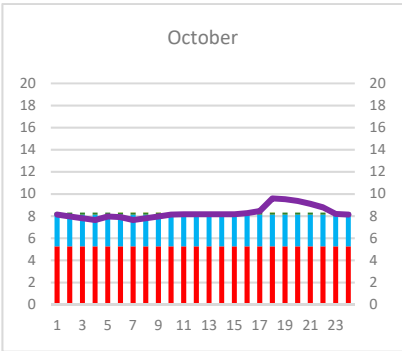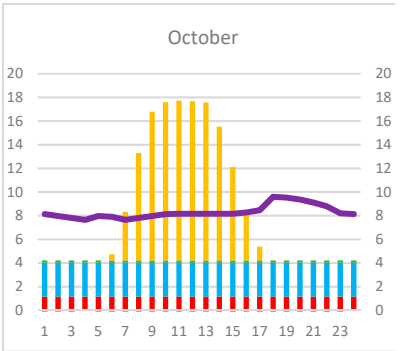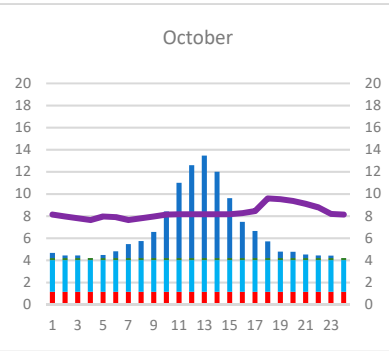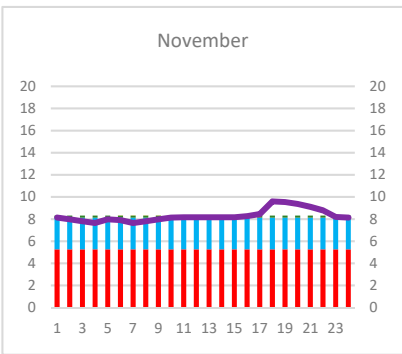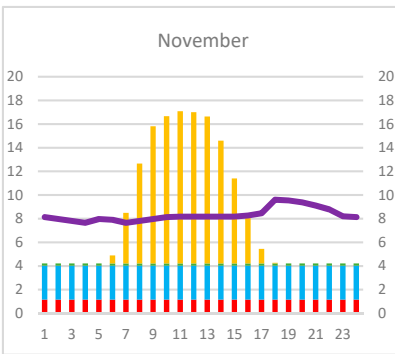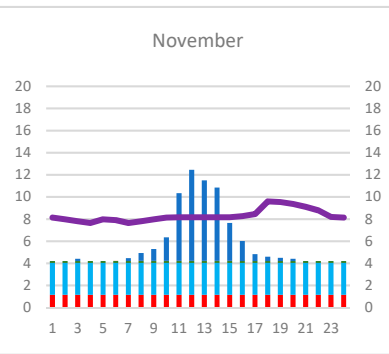

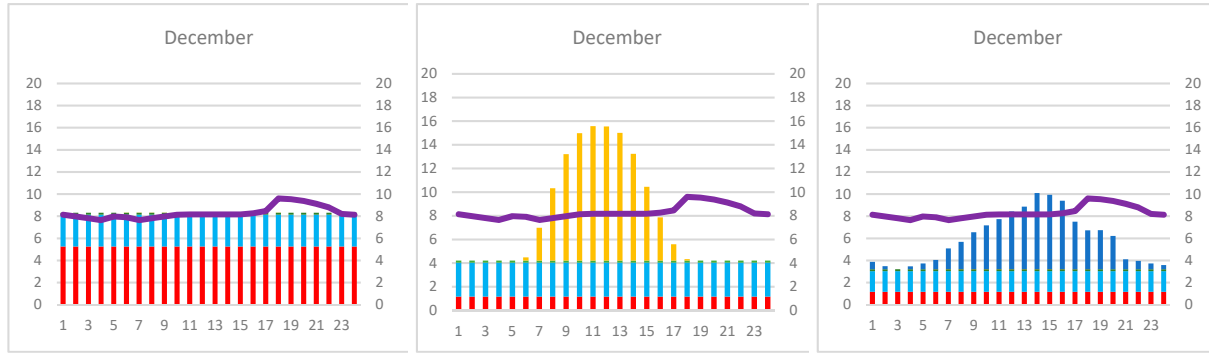

Figure S1. Typical electricity generation on Java and Bali islands for each month in 2020 from three adjusted energy mixes (in GWh).

All excess energy generated will be assigned to energy storage for later use. Figure S2 shows the excess energy that is stored in and extracted from the energy storage for the three scenarios.



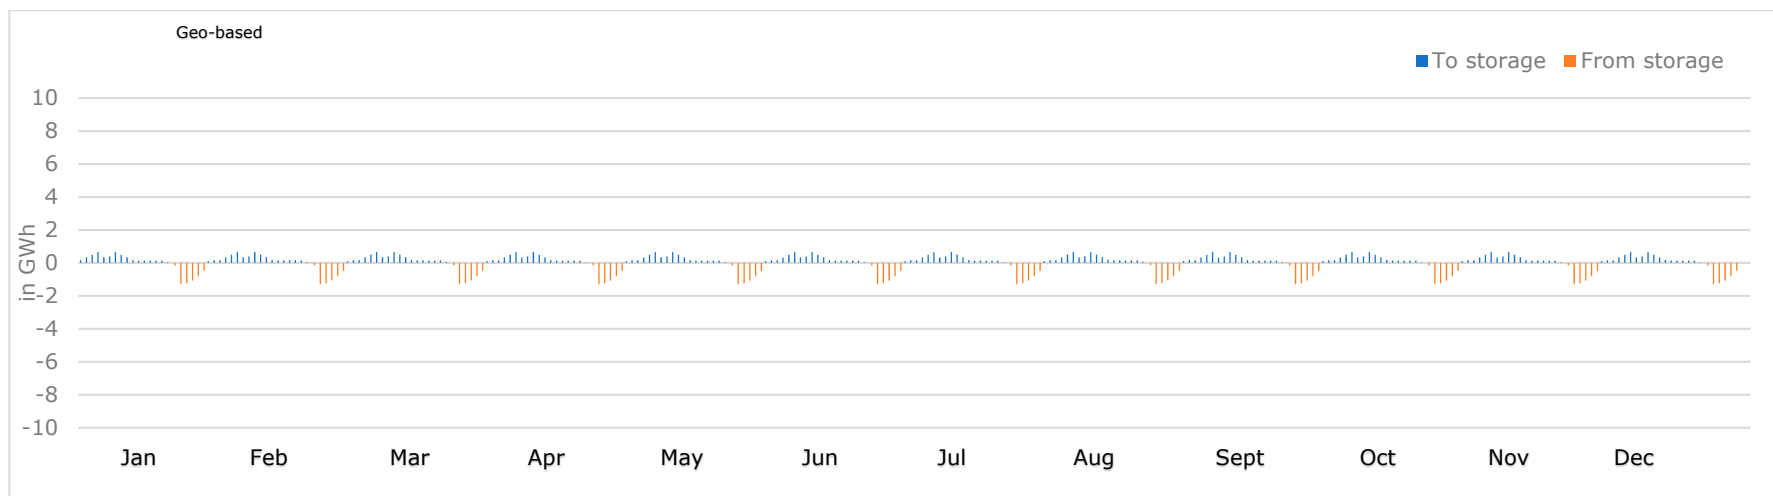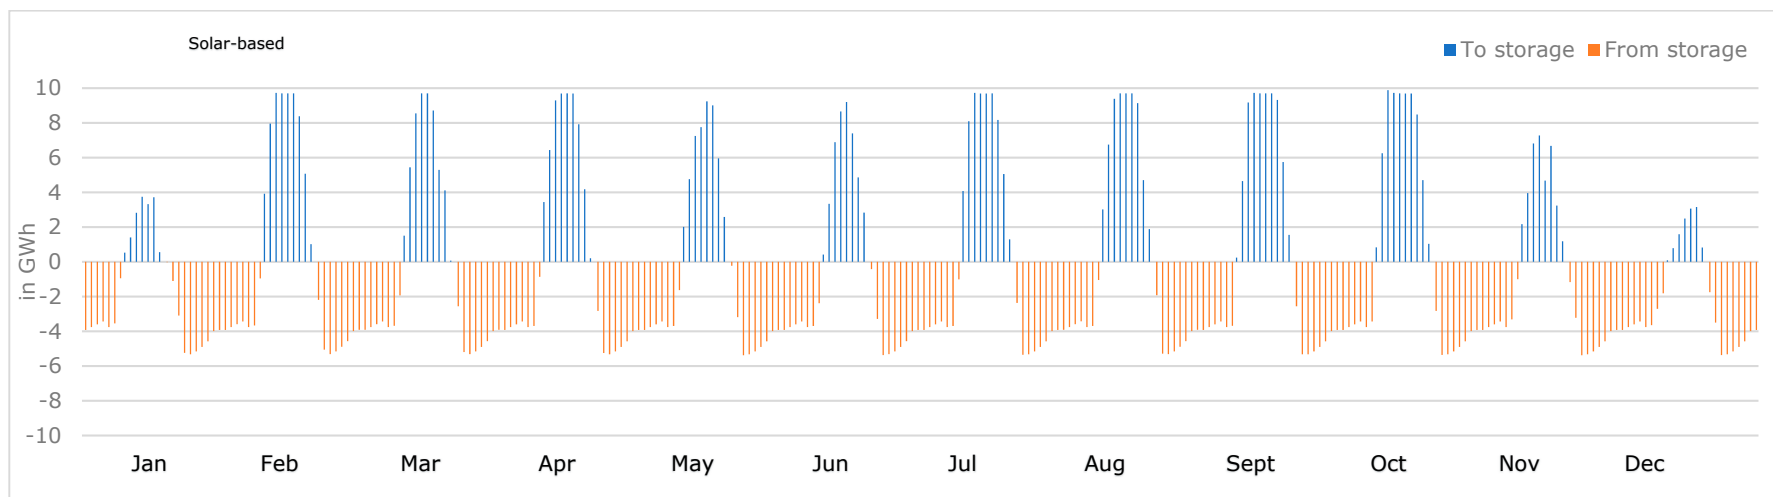

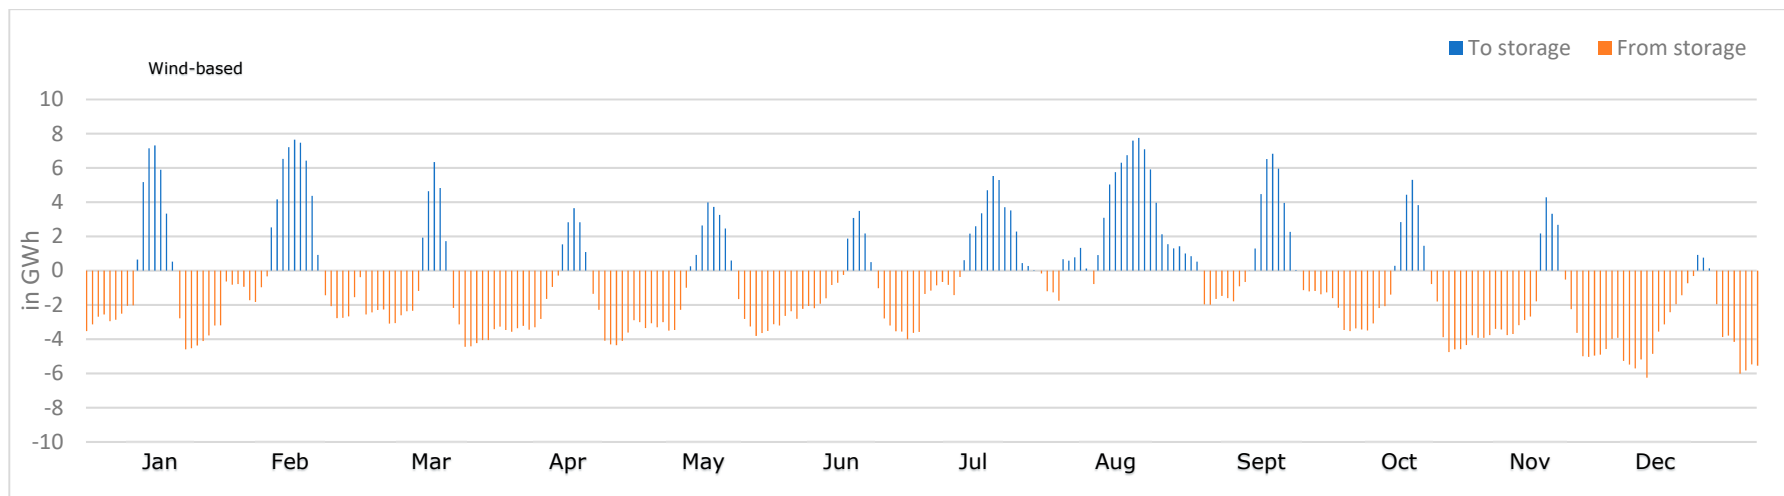

Figure S2. Energy to and from energy storage in GWh for the three energy mixes.

## S5 Annual capacity development for each source

Table S4 shows different schemes of capacity development on geo-, solar- and wind-based scenarios to keep up the electricity generation with the electricity demand. Geothermal, hydropower, and MSW potential can meet demand until 2024, 2030, and 2039, respectively, in the geo-based energy mix. From then until 2050, solar and wind energy should lead capacity development. In the solar-based mix, solar energy suffices until 2034, hydropower until 2030, and MSW until 2038. Wind and hydropower should be pivotal until 2043, after which other RES or fossil fuels may complement solar. For the wind-based mix, wind and hydropower potential are effective until 2032 and 2030. Solar, wind, and MSW should dominate until 2046, followed by other RES or fossil fuels.

Table S4. Capacity development for three significant scenarios each year.

### Geo-based

| Year<br>s | Solar<br>Capacit<br>y (GW) | Wind<br>Capacit<br>y (GW) | Potential of<br>solar and<br>wind (GW) | Status      | Geotherma<br>l (GW) | Potential of<br>Geotherma<br>l (GW) | Status        | Hydropowe<br>r (GW) | Potential of<br>hydropowe<br>r (GW) | Status        | MS<br>W<br>(GW) | Potentia<br>l of<br>MSW<br>(GW) | Status        | Total<br>Require<br>d<br>Capacity<br>(GW) | Capacity<br>development/yea<br>r |
|-----------|----------------------------|---------------------------|----------------------------------------|-------------|---------------------|-------------------------------------|---------------|---------------------|-------------------------------------|---------------|-----------------|---------------------------------|---------------|-------------------------------------------|----------------------------------|
| 2020      | 0.003                      | 0.001                     | 33.1<br>2                              | Matche<br>d | 5.26                | 6.75                                | Matched       | 2.87                | 4.99                                | Matched       | 0.18            | 0.50                            | Matched       | 8.32                                      | 0.43                             |
| 2021      | 0.003                      | 0.001                     | 33.1<br>2                              | Matche<br>d | 5.54                | 6.75                                | Matched       | 3.02                | 4.99                                | Matched       | 0.19            | 0.50                            | Matched       | 8.75                                      | 0.48                             |
| 2022      | 0.003                      | 0.001                     | 33.1<br>2                              | Matche<br>d | 5.84                | 6.75                                | Matched       | 3.18                | 4.99                                | Matched       | 0.20            | 0.50                            | Matched       | 9.23                                      | 0.51                             |
| 2023      | 0.004                      | 0.001                     | 33.1<br>2                              | Matche<br>d | 6.16                | 6.75                                | Matched       | 3.36                | 4.99                                | Matched       | 0.22            | 0.50                            | Matched       | 9.74                                      | 0.55                             |
| 2024      | 0.004                      | 0.001                     | 33.1<br>2                              | Matche<br>d | 6.51                | 6.75                                | Matched       | 3.55                | 4.99                                | Matched       | 0.23            | 0.50                            | Matched       | 10.29                                     | 0.59                             |
| 2025      | 0.004                      | 0.001                     | 33.1<br>2                              | Matche<br>d | 6.88                | 6.75                                | Unmatche<br>d | 3.75                | 4.99                                | Matched       | 0.24            | 0.50                            | Matched       | 10.88                                     | 0.62                             |
| 2026      | 0.004                      | 0.001                     | 33.1<br>2                              | Matche<br>d | 7.28                | 6.75                                | Unmatche<br>d | 3.96                | 4.99                                | Matched       | 0.25            | 0.50                            | Matched       | 11.50                                     | 0.66                             |
| 2027      | 0.004                      | 0.001                     | 33.1<br>2                              | Matche<br>d | 7.69                | 6.75                                | Unmatche<br>d | 4.19                | 4.99                                | Matched       | 0.27            | 0.50                            | Matched       | 12.16                                     | 0.70                             |
| 2028      | 0.005                      | 0.001                     | 33.1<br>2                              | Matche<br>d | 8.13                | 6.75                                | Unmatche<br>d | 4.43                | 4.99                                | Matched       | 0.28            | 0.50                            | Matched       | 12.86                                     | 0.73                             |
| 2029      | 0.005                      | 0.001                     | 33.1<br>2                              | Matche<br>d | 8.60                | 6.75                                | Unmatche<br>d | 4.68                | 4.99                                | Matched       | 0.30            | 0.50                            | Matched       | 13.59                                     | 0.78                             |
| 2030      | 0.005                      | 0.001                     | 33.1<br>2                              | Matche<br>d | 9.09                | 6.75                                | Unmatche<br>d | 4.95                | 4.99                                | Matched       | 0.32            | 0.50                            | Matched       | 14.37                                     | 0.81                             |
| 2031      | 0.005                      | 0.001                     | 33.1<br>2                              | Matche<br>d | 9.60                | 6.75                                | Unmatche<br>d | 5.23                | 4.99                                | Unmatche<br>d | 0.34            | 0.50                            | Matched       | 15.17                                     | 0.85                             |
| 2032      | 0.006                      | 0.001                     | 33.1<br>2                              | Matche<br>d | 10.14               | 6.75                                | Unmatche<br>d | 5.52                | 4.99                                | Unmatche<br>d | 0.35            | 0.50                            | Matched       | 16.02                                     | 0.90                             |
| 2033      | 0.006                      | 0.001                     | 33.1<br>2                              | Matche<br>d | 10.71               | 6.75                                | Unmatche<br>d | 5.83                | 4.99                                | Unmatche<br>d | 0.37            | 0.50                            | Matched       | 16.92                                     | 0.95                             |
| 2034      | 0.006                      | 0.002                     | 33.1<br>2                              | Matche<br>d | 11.31               | 6.75                                | Unmatche<br>d | 6.16                | 4.99                                | Unmatche<br>d | 0.39            | 0.50                            | Matched       | 17.87                                     | 1.00                             |
| 2035      | 0.007                      | 0.002                     | 33.1<br>2                              | Matche<br>d | 11.94               | 6.75                                | Unmatche<br>d | 6.51                | 4.99                                | Unmatche<br>d | 0.42            | 0.50                            | Matched       | 18.88                                     | 1.06                             |
| 2036      | 0.007                      | 0.002                     | 33.1<br>2                              | Matche<br>d | 12.61               | 6.75                                | Unmatche<br>d | 6.87                | 4.99                                | Unmatche<br>d | 0.44            | 0.50                            | Matched       | 19.94                                     | 1.12                             |
| 2037      | 0.008                      | 0.002                     | 33.1<br>2                              | Matche<br>d | 13.32               | 6.75                                | Unmatche<br>d | 7.26                | 4.99                                | Unmatche<br>d | 0.47            | 0.50                            | Matched       | 21.06                                     | 1.18                             |
| 2038      | 0.008                      | 0.002                     | 33.1<br>2                              | Matche<br>d | 14.07               | 6.75                                | Unmatche<br>d | 7.67                | 4.99                                | Unmatche<br>d | 0.49            | 0.50                            | Matched       | 22.24                                     | 1.25                             |
| 2039      | 0.008                      | 0.002                     | 33.1<br>2                              | Matche<br>d | 14.86               | 6.75                                | Unmatche<br>d | 8.10                | 4.99                                | Unmatche<br>d | 0.52            | 0.50                            | Unmatche<br>d | 23.49                                     | 1.32                             |
| 2040      | 0.009                      | 0.002                     | 33.1<br>2                              | Matche<br>d | 15.69               | 6.75                                | Unmatche<br>d | 8.55                | 4.99                                | Unmatche<br>d | 0.55            | 0.50                            | Unmatche<br>d | 24.81                                     | 1.39                             |
| 2041      | 0.009                      | 0.002                     | 33.1<br>2                              | Matche<br>d | 16.58               | 6.75                                | Unmatche<br>d | 9.03                | 4.99                                | Unmatche<br>d | 0.58            | 0.50                            | Unmatche<br>d | 26.20                                     | 1.47                             |
| 2042      | 0.010                      | 0.002                     | 33.1<br>2                              | Matche<br>d | 17.51               | 6.75                                | Unmatche<br>d | 9.54                | 4.99                                | Unmatche<br>d | 0.61            | 0.50                            | Unmatche<br>d | 27.67                                     | 1.55                             |
| 2043      | 0.011                      | 0.003                     | 33.1<br>2                              | Matche<br>d | 18.49               | 6.75                                | Unmatche<br>d | 10.07               | 4.99                                | Unmatche<br>d | 0.65            | 0.50                            | Unmatche<br>d | 29.22                                     | 1.64                             |
| 2044      | 0.011                      | 0.003                     | 33.1<br>2                              | Matche<br>d | 19.53               | 6.75                                | Unmatche<br>d | 10.64               | 4.99                                | Unmatche<br>d | 0.68            | 0.50                            | Unmatche<br>d | 30.86                                     | 1.73                             |
| 2045      | 0.012                      | 0.003                     | 33.1<br>2                              | Matche<br>d | 20.62               | 6.75                                | Unmatche<br>d | 11.24               | 4.99                                | Unmatche<br>d | 0.72            | 0.50                            | Unmatche<br>d | 32.60                                     | 1.83                             |
| 2046      | 0.012                      | 0.003                     | 33.1<br>2                              | Matche<br>d | 21.78               | 6.75                                | Unmatche<br>d | 11.87               | 4.99                                | Unmatche<br>d | 0.76            | 0.50                            | Unmatche<br>d | 34.43                                     | 1.93                             |
| 2047      | 0.013                      | 0.003                     | 33.1<br>2                              | Matche<br>d | 23.01               | 6.75                                | Unmatche<br>d | 12.53               | 4.99                                | Unmatche<br>d | 0.80            | 0.50                            | Unmatche<br>d | 36.36                                     | 2.04                             |
| 2048      | 0.014                      | 0.003                     | 33.1<br>2                              | Matche<br>d | 24.30               | 6.75                                | Unmatche<br>d | 13.24               | 4.99                                | Unmatche<br>d | 0.85            | 0.50                            | Unmatche<br>d | 38.40                                     | 2.16                             |
| 2049      | 0.015                      | 0.004                     | 33.1<br>2                              | Matche<br>d | 25.66               | 6.75                                | Unmatche<br>d | 13.98               | 4.99                                | Unmatche<br>d | 0.90            | 0.50                            | Unmatche<br>d | 40.56                                     | 2.28                             |
| 2050      | 0.015                      | 0.004                     | 33.1<br>2                              | Matche<br>d | 27.10               | 6.75                                | Unmatche<br>d | 14.77               | 4.99                                | Unmatche<br>d | 0.95            | 0.50                            | Unmatche<br>d | 42.83                                     | unknown                          |

### Solar-based

| Year<br>s | Solar<br>Capacit<br>y (GW) | Wind<br>Capacit<br>y (GW) | Potential of<br>solar and<br>wind (GW) | Status | Geotherma<br>l (GW) | Potential of<br>Geotherma<br>l (GW) | Status | Hydropowe<br>r (GW) | Potential of<br>hydropowe<br>r (GW) | Status | MS<br>W<br>(GW) | Potentia<br>l of<br>MSW<br>(GW) | Status | Total<br>Require<br>d<br>Capacity<br>(GW) | Capacity<br>development/yea<br>r |
|-----------|----------------------------|---------------------------|----------------------------------------|--------|---------------------|-------------------------------------|--------|---------------------|-------------------------------------|--------|-----------------|---------------------------------|--------|-------------------------------------------|----------------------------------|
|-----------|----------------------------|---------------------------|----------------------------------------|--------|---------------------|-------------------------------------|--------|---------------------|-------------------------------------|--------|-----------------|---------------------------------|--------|-------------------------------------------|----------------------------------|

|      |        |       |           |           |                |      |      |              |       |      |                |      |      |                |              |         |
|------|--------|-------|-----------|-----------|----------------|------|------|--------------|-------|------|----------------|------|------|----------------|--------------|---------|
| 2020 | 14.890 | 0.001 | 33.1<br>2 | 24.0<br>1 | Matched        | 1.16 | 6.75 | Matched<br>d | 2.87  | 4.99 | Matched        | 0.18 | 0.50 | Matched        | 19.10        | 1.00    |
| 2021 | 15.666 | 0.001 | 33.1<br>2 | 24.0<br>1 | Matched        | 1.22 | 6.75 | Matched<br>d | 3.02  | 4.99 | Matched        | 0.19 | 0.50 | Matched        | 20.10        | 1.10    |
| 2022 | 16.523 | 0.001 | 33.1<br>2 | 24.0<br>1 | Matched        | 1.28 | 6.75 | Matched<br>d | 3.18  | 4.99 | Matched        | 0.20 | 0.50 | Matched        | 21.19        | 1.18    |
| 2023 | 17.440 | 0.001 | 33.1<br>2 | 24.0<br>1 | Matched        | 1.36 | 6.75 | Matched<br>d | 3.36  | 4.99 | Matched        | 0.22 | 0.50 | Matched        | 22.37        | 1.26    |
| 2024 | 18.422 | 0.001 | 33.1<br>2 | 24.0<br>1 | Matched        | 1.43 | 6.75 | Matched<br>d | 3.55  | 4.99 | Matched        | 0.23 | 0.50 | Matched        | 23.63        | 1.34    |
| 2025 | 19.470 | 0.001 | 33.1<br>2 | 24.0<br>1 | Matched        | 1.51 | 6.75 | Matched<br>d | 3.75  | 4.99 | Matched        | 0.24 | 0.50 | Matched        | 24.98        | 1.43    |
| 2026 | 20.584 | 0.001 | 33.1<br>2 | 24.0<br>1 | Matched        | 1.60 | 6.75 | Matched<br>d | 3.96  | 4.99 | Matched        | 0.25 | 0.50 | Matched        | 26.40        | 1.51    |
| 2027 | 21.763 | 0.001 | 33.1<br>2 | 24.0<br>1 | Matched        | 1.69 | 6.75 | Matched<br>d | 4.19  | 4.99 | Matched        | 0.27 | 0.50 | Matched        | 27.92        | 1.60    |
| 2028 | 23.010 | 0.001 | 33.1<br>2 | 24.0<br>1 | Matched        | 1.79 | 6.75 | Matched<br>d | 4.43  | 4.99 | Matched        | 0.28 | 0.50 | Matched        | 29.52        | 1.69    |
| 2029 | 24.324 | 0.001 | 33.1<br>2 | 24.0<br>1 | Matched        | 1.89 | 6.75 | Matched<br>d | 4.68  | 4.99 | Matched        | 0.30 | 0.50 | Matched        | 31.20        | 1.78    |
| 2030 | 25.713 | 0.001 | 33.1<br>2 | 24.0<br>1 | Matched        | 2.00 | 6.75 | Matched<br>d | 4.95  | 4.99 | Matched        | 0.32 | 0.50 | Matched        | 32.98        | 1.85    |
| 2031 | 27.155 | 0.001 | 33.1<br>2 | 24.0<br>1 | Matched        | 2.11 | 6.75 | Matched<br>d | 5.23  | 4.99 | Unmatched<br>d | 0.34 | 0.50 | Matched        | 34.83        | 1.96    |
| 2032 | 28.680 | 0.001 | 33.1<br>2 | 24.0<br>1 | Matched        | 2.23 | 6.75 | Matched<br>d | 5.52  | 4.99 | Unmatched<br>d | 0.35 | 0.50 | Matched        | 36.79        | 2.07    |
| 2033 | 30.290 | 0.001 | 33.1<br>2 | 24.0<br>1 | Matched        | 2.36 | 6.75 | Matched<br>d | 5.83  | 4.99 | Unmatched<br>d | 0.37 | 0.50 | Matched        | 38.86        | 2.18    |
| 2034 | 31.991 | 0.002 | 33.1<br>2 | 24.0<br>1 | Matched        | 2.49 | 6.75 | Matched<br>d | 6.16  | 4.99 | Unmatched<br>d | 0.39 | 0.50 | Matched        | 41.04        | 2.30    |
| 2035 | 33.788 | 0.002 | 33.1<br>2 | 24.0<br>1 | Unmatched<br>d | 2.63 | 6.75 | Matched<br>d | 6.51  | 4.99 | Unmatched<br>d | 0.42 | 0.50 | Matched        | 43.34        | 2.43    |
| 2036 | 35.685 | 0.002 | 33.1<br>2 | 24.0<br>1 | Unmatched<br>d | 2.78 | 6.75 | Matched<br>d | 6.87  | 4.99 | Unmatched<br>d | 0.44 | 0.50 | Matched        | 45.77        | 2.57    |
| 2037 | 37.688 | 0.002 | 33.1<br>2 | 24.0<br>1 | Unmatched<br>d | 2.93 | 6.75 | Matched<br>d | 7.26  | 4.99 | Unmatched<br>d | 0.47 | 0.50 | Matched        | 48.35        | 2.71    |
| 2038 | 39.805 | 0.002 | 33.1<br>2 | 24.0<br>1 | Unmatched<br>d | 3.10 | 6.75 | Matched<br>d | 7.67  | 4.99 | Unmatched<br>d | 0.49 | 0.50 | Matched        | 51.06        | 2.87    |
| 2039 | 42.040 | 0.002 | 33.1<br>2 | 24.0<br>1 | Unmatched<br>d | 3.27 | 6.75 | Matched<br>d | 8.10  | 4.99 | Unmatched<br>d | 0.52 | 0.50 | Unmatched<br>d | 53.93        | 3.03    |
| 2040 | 44.400 | 0.002 | 33.1<br>2 | 24.0<br>1 | Unmatched<br>d | 3.45 | 6.75 | Matched<br>d | 8.55  | 4.99 | Unmatched<br>d | 0.55 | 0.50 | Unmatched<br>d | 56.95        | 3.20    |
| 2041 | 46.893 | 0.002 | 33.1<br>2 | 24.0<br>1 | Unmatched<br>d | 3.65 | 6.75 | Matched<br>d | 9.03  | 4.99 | Unmatched<br>d | 0.58 | 0.50 | Unmatched<br>d | 60.15        | 3.38    |
| 2042 | 49.526 | 0.002 | 33.1<br>2 | 24.0<br>1 | Unmatched<br>d | 3.85 | 6.75 | Matched<br>d | 9.54  | 4.99 | Unmatched<br>d | 0.61 | 0.50 | Unmatched<br>d | 63.53        | 3.57    |
| 2043 | 52.307 | 0.003 | 33.1<br>2 | 24.0<br>1 | Unmatched<br>d | 4.07 | 6.75 | Matched<br>d | 10.07 | 4.99 | Unmatched<br>d | 0.65 | 0.50 | Unmatched<br>d | 67.10        | 3.77    |
| 2044 | 55.244 | 0.003 | 33.1<br>2 | 24.0<br>1 | Unmatched<br>d | 4.30 | 6.75 | Matched<br>d | 10.64 | 4.99 | Unmatched<br>d | 0.68 | 0.50 | Unmatched<br>d | 70.86        | 3.98    |
| 2045 | 58.346 | 0.003 | 33.1<br>2 | 24.0<br>1 | Unmatched<br>d | 4.54 | 6.75 | Matched<br>d | 11.24 | 4.99 | Unmatched<br>d | 0.72 | 0.50 | Unmatched<br>d | 74.84        | 4.20    |
| 2046 | 61.622 | 0.003 | 33.1<br>2 | 24.0<br>1 | Unmatched<br>d | 4.79 | 6.75 | Matched<br>d | 11.87 | 4.99 | Unmatched<br>d | 0.76 | 0.50 | Unmatched<br>d | 79.05        | 4.44    |
| 2047 | 65.083 | 0.003 | 33.1<br>2 | 24.0<br>1 | Unmatched<br>d | 5.06 | 6.75 | Matched<br>d | 12.53 | 4.99 | Unmatched<br>d | 0.80 | 0.50 | Unmatched<br>d | 83.48        | 4.69    |
| 2048 | 68.737 | 0.003 | 33.1<br>2 | 24.0<br>1 | Unmatched<br>d | 5.35 | 6.75 | Matched<br>d | 13.24 | 4.99 | Unmatched<br>d | 0.85 | 0.50 | Unmatched<br>d | 88.17        | 4.95    |
| 2049 | 72.596 | 0.004 | 33.1<br>2 | 24.0<br>1 | Unmatched<br>d | 5.65 | 6.75 | Matched<br>d | 13.98 | 4.99 | Unmatched<br>d | 0.90 | 0.50 | Unmatched<br>d | 93.12        | 5.23    |
| 2050 | 76.673 | 0.004 | 33.1<br>2 | 24.0<br>1 | Unmatched<br>d | 5.96 | 6.75 | Matched<br>d | 14.77 | 4.99 | Unmatched<br>d | 0.95 | 0.50 | Unmatched<br>d | <b>98.35</b> | Unknown |

## Wind-based

| Years | Solar Capacity (GW) | Wind Capacity (GW) | Potential of solar and wind (GW) | Status    | Geothermal (GW) | Potential of Geothermal (GW) | Status  | Hydropower (GW) | Potential of hydropower (GW) | Status    | MSW (GW) | Potential of MSW (GW) | Status  | Total Required Capacity (GW) | Capacity development/year |
|-------|---------------------|--------------------|----------------------------------|-----------|-----------------|------------------------------|---------|-----------------|------------------------------|-----------|----------|-----------------------|---------|------------------------------|---------------------------|
| 2020  | 0.003               | 12.27              | 33.12<br>24.01                   | Matched   | 1.16            | 6.75                         | Matched | 2.87            | 4.99                         | Matched   | 0.18     | 0.50                  | Matched | 16.48                        | 0.85                      |
| 2021  | 0.003               | 12.905             | 33.12<br>24.01                   | Matched   | 1.22            | 6.75                         | Matched | 3.02            | 4.99                         | Matched   | 0.18     | 0.50                  | Matched | 17.33                        | 0.94                      |
| 2022  | 0.003               | 13.611             | 33.12<br>24.01                   | Matched   | 1.28            | 6.75                         | Matched | 3.18            | 4.99                         | Matched   | 0.18     | 0.50                  | Matched | 18.27                        | 1.00                      |
| 2023  | 0.004               | 14.367             | 33.12<br>24.01                   | Matched   | 1.36            | 6.75                         | Matched | 3.36            | 4.99                         | Matched   | 0.18     | 0.50                  | Matched | 19.27                        | 1.07                      |
| 2024  | 0.004               | 15.175             | 33.12<br>24.01                   | Matched   | 1.43            | 6.75                         | Matched | 3.55            | 4.99                         | Matched   | 0.18     | 0.50                  | Matched | 20.34                        | 1.15                      |
| 2025  | 0.004               | 16.039             | 33.12<br>24.01                   | Matched   | 1.51            | 6.75                         | Matched | 3.75            | 4.99                         | Matched   | 0.18     | 0.50                  | Matched | 21.49                        | 1.22                      |
| 2026  | 0.004               | 16.956             | 33.12<br>24.01                   | Matched   | 1.60            | 6.75                         | Matched | 3.96            | 4.99                         | Matched   | 0.18     | 0.50                  | Matched | 22.71                        | 1.29                      |
| 2027  | 0.004               | 17.928             | 33.12<br>24.01                   | Matched   | 1.69            | 6.75                         | Matched | 4.19            | 4.99                         | Matched   | 0.18     | 0.50                  | Matched | 24.00                        | 1.36                      |
| 2028  | 0.005               | 18.955             | 33.12<br>24.01                   | Matched   | 1.79            | 6.75                         | Matched | 4.43            | 4.99                         | Matched   | 0.18     | 0.50                  | Matched | 25.36                        | 1.44                      |
| 2029  | 0.005               | 20.038             | 33.12<br>24.01                   | Matched   | 1.89            | 6.75                         | Matched | 4.68            | 4.99                         | Matched   | 0.18     | 0.50                  | Matched | 26.80                        | 1.52                      |
| 2030  | 0.005               | 21.182             | 33.12<br>24.01                   | Matched   | 2.00            | 6.75                         | Matched | 4.95            | 4.99                         | Matched   | 0.18     | 0.50                  | Matched | 28.32                        | 1.58                      |
| 2031  | 0.005               | 22.370             | 33.12<br>24.01                   | Matched   | 2.11            | 6.75                         | Matched | 5.23            | 4.99                         | Unmatched | 0.18     | 0.50                  | Matched | 29.90                        | 1.67                      |
| 2032  | 0.006               | 23.626             | 33.12<br>24.01                   | Matched   | 2.23            | 6.75                         | Matched | 5.52            | 4.99                         | Unmatched | 0.18     | 0.50                  | Matched | 31.57                        | 1.76                      |
| 2033  | 0.006               | 24.953             | 33.12<br>24.01                   | Unmatched | 2.36            | 6.75                         | Matched | 5.83            | 4.99                         | Unmatched | 0.18     | 0.50                  | Matched | 33.33                        | 1.86                      |
| 2034  | 0.006               | 26.354             | 33.12<br>24.01                   | Unmatched | 2.49            | 6.75                         | Matched | 6.16            | 4.99                         | Unmatched | 0.18     | 0.50                  | Matched | 35.19                        | 1.97                      |
| 2035  | 0.007               | 27.833             | 33.12<br>24.01                   | Unmatched | 2.63            | 6.75                         | Matched | 6.51            | 4.99                         | Unmatched | 0.18     | 0.50                  | Matched | 37.16                        | 2.08                      |
| 2036  | 0.007               | 29.396             | 33.12<br>24.01                   | Unmatched | 2.78            | 6.75                         | Matched | 6.87            | 4.99                         | Unmatched | 0.18     | 0.50                  | Matched | 39.24                        | 2.19                      |
| 2037  | 0.008               | 31.047             | 33.12<br>24.01                   | Unmatched | 2.93            | 6.75                         | Matched | 7.26            | 4.99                         | Unmatched | 0.18     | 0.50                  | Matched | 41.43                        | 2.32                      |
| 2038  | 0.008               | 32.790             | 33.12<br>24.01                   | Unmatched | 3.10            | 6.75                         | Matched | 7.67            | 4.99                         | Unmatched | 0.18     | 0.50                  | Matched | 43.74                        | 2.45                      |
| 2039  | 0.008               | 34.631             | 33.12<br>24.01                   | Unmatched | 3.27            | 6.75                         | Matched | 8.10            | 4.99                         | Unmatched | 0.18     | 0.50                  | Matched | 46.19                        | 2.58                      |
| 2040  | 0.009               | 36.576             | 33.12<br>24.01                   | Unmatched | 3.45            | 6.75                         | Matched | 8.55            | 4.99                         | Unmatched | 0.18     | 0.50                  | Matched | 48.77                        | 2.73                      |
| 2041  | 0.009               | 38.630             | 33.12<br>24.01                   | Unmatched | 3.65            | 6.75                         | Matched | 9.03            | 4.99                         | Unmatched | 0.18     | 0.50                  | Matched | 51.50                        | 2.88                      |
| 2042  | 0.010               | 40.799             | 33.12<br>24.01                   | Unmatched | 3.85            | 6.75                         | Matched | 9.54            | 4.99                         | Unmatched | 0.18     | 0.50                  | Matched | 54.38                        | 3.04                      |
| 2043  | 0.011               | 43.090             | 33.12<br>24.01                   | Unmatched | 4.07            | 6.75                         | Matched | 10.07           | 4.99                         | Unmatched | 0.18     | 0.50                  | Matched | 57.43                        | 3.21                      |
| 2044  | 0.011               | 45.509             | 33.12<br>24.01                   | Unmatched | 4.30            | 6.75                         | Matched | 10.64           | 4.99                         | Unmatched | 0.18     | 0.50                  | Matched | 60.64                        | 3.39                      |
| 2045  | 0.012               | 48.064             | 33.12<br>24.01                   | Unmatched | 4.54            | 6.75                         | Matched | 11.24           | 4.99                         | Unmatched | 0.18     | 0.50                  | Matched | 64.03                        | 3.59                      |
| 2046  | 0.012               | 50.763             | 33.12<br>24.01                   | Unmatched | 4.79            | 6.75                         | Matched | 11.87           | 4.99                         | Unmatched | 0.18     | 0.50                  | Matched | 67.62                        | 3.79                      |
| 2047  | 0.013               | 53.614             | 33.12<br>24.01                   | Unmatched | 5.06            | 6.75                         | Matched | 12.53           | 4.99                         | Unmatched | 0.18     | 0.50                  | Matched | 71.41                        | 4.00                      |
| 2048  | 0.014               | 56.624             | 33.12<br>24.01                   | Unmatched | 5.35            | 6.75                         | Matched | 13.24           | 4.99                         | Unmatched | 0.18     | 0.50                  | Matched | 75.41                        | 4.22                      |
| 2049  | 0.015               | 59.803             | 33.12<br>24.01                   | Unmatched | 5.65            | 6.75                         | Matched | 13.98           | 4.99                         | Unmatched | 0.18     | 0.50                  | Matched | 79.63                        | 4.46                      |
| 2050  | 0.015               | 63.161             | 33.12<br>24.01                   | Unmatched | 5.96            | 6.75                         | Matched | 14.77           | 4.99                         | Unmatched | 0.18     | 0.50                  | Matched | <b>84.09</b>                 | unknown                   |

\*Orange: solar potential.

\*Grey: wind potential.

\*Green: status, highlighting that the potential of RES can still be developed to meet the demand.

\*Red: the last year of a specific RES can be developed.

\*The capacity of each RES after red cell is still growing to show the required capacity to balance the growing demand even though the current potential is insufficient

## S6 Annual capacity development

Figure S3 highlighted that only geo-based scenario can meet the electricity demand without any additional extension.

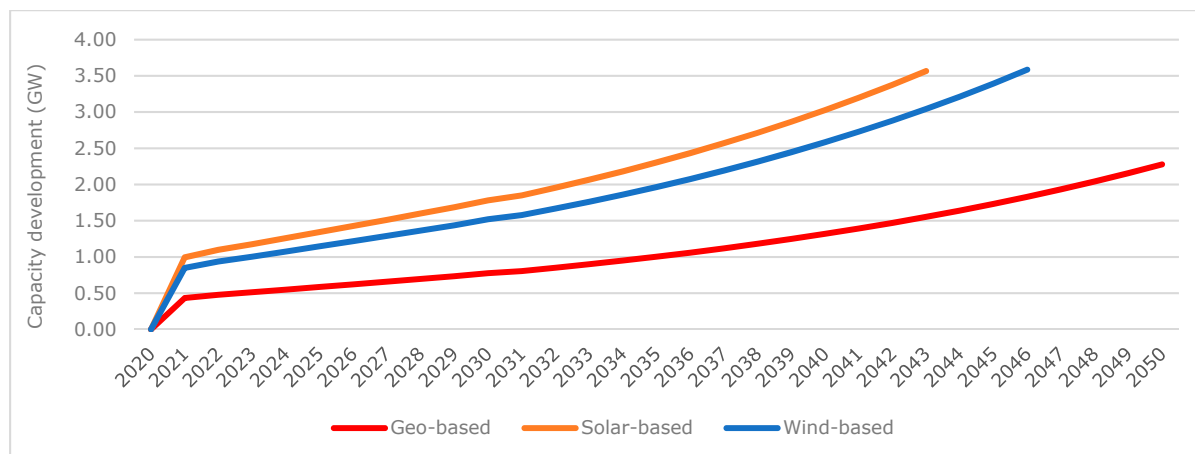

Figure S3. Capacity development per year for the three significant scenarios with average increase/year: geo-based 1.15 GW, solar-based 2.64 GW, wind-based 2.25 GW.

## S7 Sensitivity analysis of the wind-based energy mix

Table S5 depicts that the wind-based scenario has a high resistance towards extreme climate. It fails to supply reliable electricity only when the wind speed is lower by 10%. However, there is an alternative to deal with this issue: adding some capacities from solar panels or geothermal energy. It is because the potential of solar and geothermal energy is excessive in Java and Bali.

Table S5. Result of scenario analysis.

|                                                            | CAPEX             | OPEX              | ROI %               | CO <sub>2</sub> emission<br>(billion tons) | CO <sub>2</sub> reduction<br>(%) | Generation<br>ratio (%) | Reliability | Demand<br>(TWh) | Curtailment<br>(TWh) |
|------------------------------------------------------------|-------------------|-------------------|---------------------|--------------------------------------------|----------------------------------|-------------------------|-------------|-----------------|----------------------|
| Before sensitivity analysis/original scenario (adjusted 6) |                   |                   |                     |                                            |                                  |                         |             |                 |                      |
| Wind-based                                                 | 50.07             | 3.81              | 138.99              | 17.90                                      | 94.08                            | 100                     | Reliable    | 72.76           | 0                    |
| After sensitivity analysis                                 |                   |                   |                     |                                            |                                  |                         |             |                 |                      |
| Extreme climate *                                          | 50.07             | 3.81              | 120.08<br>(-13.61%) | 17.47 (-2.40%)                             | 94.23<br>(+0.14)                 | 95 (-5)                 | Reliable    | 72.76           | -3.56                |
| 37 **                                                      | 47.48<br>(+5.18)  | 4.47<br>(+17.33)  | 124.47<br>(-10.45%) | 19.19 (+7.19%)                             | 93.66 (-0.43)                    | 100                     | Reliable    | 72.76           | 0                    |
| 38***                                                      | 48.01<br>(+4.13)  | 4.42<br>(+15.98%) | 125.79<br>(-9.50%)  | 18.84 (+5.25%)                             | 93.77 (-0.31)                    | 100                     | Reliable    | 72.76           | 0                    |
| 39****                                                     | 47.74<br>(+4.65%) | 4.73<br>(+24.30%) | 125.12<br>(-9.98%)  | 19.00 (+6.13%)                             | 93.72 (-0.36)                    | 100                     | Reliable    | 72.76           | 0                    |

\* Extreme climate: 10% higher solar irradiation and 10% lower wind speed.

\*\* 37: wind energy capacity is lowered by 10% and replaced by solar energy.

\*\*\* 38: wind energy capacity is lowered by 10% and replaced by geothermal energy.

\*\*\*\* 39: wind energy capacity is lowered by 10% and replaced by solar (5%) and geothermal energy (5%).

## References

- [1] PLN, PT. (2020). Electricity Statistics 2020.
- [2] Jamdade, P. G., Patil, S. V., & Jamdade, S. G. (2013). Assessment of power coefficient of an offline wind turbine generator system. *Electronic Journal of Energy & Environment*, 1(3).
- [3] Omar Nadjemi, Tarek Nacer, Abderrahmane Hamidat, and Hassen Salhi. “Optimal hybrid PV/wind energy system sizing: Application of cuckoo search algorithm for Algerian dairy farms”. In: *Renewable and Sustainable Energy Reviews* 70 (2017), pp. 1352–1365.
- [4] van Leeuwen, L. B., Cappon, H. J., & Keesman, K. J. (2021). Urban bio-waste as a flexible source of electricity in a fully renewable energy system. *Biomass and Bioenergy*, 145, 105931.
